# Supplementary material for: Psychiatric Hospitalizations: A Comparison by Gender, Sociodemographics, Clinical Profile, and Postdischarge Outcomes
Source: Atypon-hosted journal article supplement (doi:10.1176/appi.ps.201500547), 2016-08-01

**Sociodemographic and health history characteristics of 48, 083 women and 46,972 men discharged from an inpatient psychiatric unit in Ontario, presented using N (%) unless otherwise specified**

| Variable                                                   | Women         | Men           | Standardized difference |
|------------------------------------------------------------|---------------|---------------|-------------------------|
| <b>Sociodemographic</b>                                    |               |               |                         |
| Median age (interquartile range, IQR) in years             | 46 (32-57)    | 42 (28-53)    | .21                     |
| Marital status of married or with common-law partner       | 15,419 (32.1) | 11,959 (25.5) | .29                     |
| Education level high school or less                        | 22,313 (50.6) | 17,386 (53.0) | .14                     |
| Income source from disability or social assistance         | 10,854 (22.6) | 11,463 (24.4) | .04                     |
| Living situation:                                          |               |               |                         |
| Private (i.e. own/renting)                                 | 44,145 (91.8) | 41,705 (88.8) | .10                     |
| Homeless                                                   | 656 (1.4)     | 1251 (2.7)    | .09                     |
| Lowest neighbourhood income quintile                       | 13,655 (28.4) | 13,149 (28.0) | .01                     |
| Rural region of residence (population < 10,000)            | 5,192 (10.8)  | 5,283 (11.2)  | .01                     |
| Life stressors in past year:                               |               |               |                         |
| Any                                                        | 23,761 (49.4) | 21,695 (46.2) | .11                     |
| Serious accident                                           | 2666 (5.54)   | 2681 (5.71)   | .04                     |
| Death of close family member or friend                     | 4443 (9.24)   | 3635 (7.74)   | .08                     |
| Child custody issues                                       | 2581 (5.37)   | 1766(3.76)    | .13                     |
| Conflict in interpersonal relationship                     | 10538 (21.9)  | 9667 (20.6)   | .06                     |
| Major loss of income                                       | 5006 (10.4)   | 6099 (13.0)   | .07                     |
| Immigration                                                | 149 (.31)     | 179 (.38)     | .02                     |
| Victim of crime                                            | 577 (1.20)    | 790 (1.68)    | .05                     |
| Sexual assault or abuse                                    | 935 (1.94)    | 175 (.37)     | .37                     |
| Physical assault or abuse                                  | 1896 (3.94)   | 881 (1.88)    | .20                     |
| History of abuse or assault (lifetime):                    |               |               |                         |
| Physical                                                   | 12430 (25.9)  | 7581 (16.1)   | .20                     |
| Sexual                                                     | 11603 (25.1)  | 4126 (8.80)   | .37                     |
| Emotional                                                  | 17278 (35.9)  | 9830 (20.9)   | .28                     |
| <b>Mental health service use prior to index admission</b>  |               |               |                         |
| Lifetime admission (any):                                  | 24,835 (51.7) | 22,496 (47.9) | .08                     |
| Lifetime self-harm (any):                                  | 18,360 (38.2) | 14,779 (31.5) | .09                     |
| Within 1 year prior to index admission:                    |               |               |                         |
| Psychiatric Admission (any)                                | 4,356 (9.1)   | 4,387 (9.3)   | < .01                   |
| Psychiatric ED visits (any)                                | 14,127 (29.4) | 13,371 (28.5) | .01                     |
| Outpatient visit to family physician or psychiatrist (any) | 32,575 (65.9) | 27,247 (58.0) | .08                     |
| Community mental health involvement                        | 23,755 (49.4) | 21,087 (44.9) | .10                     |
| <b>Medical comorbidity</b>                                 |               |               |                         |
| Charlson Score within 2 years prior to index admission:    |               |               | .01                     |
| 0                                                          | 28,493 (85.4) | 28,265 (87.1) |                         |
| 1                                                          | 2,685 (8.1)   | 2,160 (6.7)   |                         |
| 2                                                          | 1,235 (3.7)   | 1,040 (3.2)   |                         |
| 3+                                                         | 940 (2.8)     | 971 (3.0)     |                         |
| Specific comorbidities at time of index admission:         |               |               |                         |
| Diabetes                                                   | 6,800 (14.1)  | 5,944 (12.7)  | .04                     |
| Chronic hypertension                                       | 12,558 (26.1) | 10,819 (23.0) | .07                     |
| Chronic obstructive lung disease                           | 2,369 (4.9)   | 1,998 (4.3)   | .03                     |
| Hypothyroidism                                             | 4,990 (10.4)  | 1,451 (3.1)   | .29                     |
| Primary Cancer                                             | 753 (1.6)     | 591 (1.3)     | .04                     |
| Moderate to severe liver disease                           | 144 (.3)      | 195 (.4)      | .02                     |
| HIV infection                                              | 30 (.1)       | 88 (.2)       | .04                     |

Any life event within past year includes any of the life events listed plus: parental abuse of alcohol and drugs, witness to severe incident, lived in war zone, had a review board hearing regarding involuntary hospitalization or capacity for finances, failed or dropped out of an education program and distress about the health of another person. Charlson score: 1 point each for myocardial infarction, cerebrovascular disease, peripheral vascular disease, diabetes; 2 points each for heart failure, chronic obstructive pulmonary disease, mild liver disease, any tumor; 3 points each for dementia, connective tissue disease; 4 points each for AIDS and moderate or severe liver disease; and 6 points for metastatic solid tumour.

**Index admission characteristics for 48,083 women and 46,972 men discharged from an inpatient psychiatric unit in Ontario, presented using N (%) unless otherwise specified**

| Variable                                                        | Women         | Men           | Standardized Difference |
|-----------------------------------------------------------------|---------------|---------------|-------------------------|
| <b>Administrative variables</b>                                 |               |               |                         |
| Median length of stay (Interquartile Range, IQR) in days        | 14 (8-28)     | 14 (8-27)     | .01                     |
| Admission status of involuntary                                 | 20,391 (43.5) | 22,128 (47.1) | .01                     |
| Reason for involuntary admission*:                              |               |               |                         |
| Threat to others                                                | 5,608 (11.7)  | 10,053 (21.4) | <b>.26</b>              |
| Threat to self                                                  | 23,868 (49.6) | 23,055 (49.1) | .01                     |
| Inability to care for self                                      | 17,664 (36.7) | 15,950 (34.0) | .06                     |
| Prescribed medications on admission (any)                       | 31,281 (93.8) | 29,926 (92.3) | .06                     |
| ECT during index admission or within 7 days prior               | 823 (1.71)    | 490 (1.04)    | .09                     |
| Planned and regular discharge (i.e. not against medical advice) | 30,900 (92.6) | 29,661 (91.4) | .04                     |
| <b>Diagnoses</b>                                                |               |               |                         |
| Primary DSM IV TR Axis I Diagnosis:                             |               |               |                         |
| Psychotic Disorder                                              | 9,486 (19.7)  | 12,666 (27.0) | <b>.17</b>              |
| Bipolar Disorder                                                | 6,908 (14.4)  | 4,861 (10.3)  | <b>.12</b>              |
| Major Depressive Disorders                                      | 15,920 (33.1) | 11,067 (23.6) | <b>.21</b>              |
| Anxiety Disorders (including PTSD and OCD)                      | 2,047 (4.25)  | 1,380 (2.94)  | .07                     |
| Eating Disorders                                                | 588 (1.22)    | 22 (.005)     | <b>.15</b>              |
| Alcohol Related Disorders                                       | 1,787 (3.72)  | 3,408 (7.26)  | <b>.16</b>              |
| Substance Use Disorders                                         | 3,013 (6.27)  | 5,474 (11.7)  | <b>.19</b>              |
| Adjustment Disorders                                            | 2,122 (4.41)  | 1,986 (4.22)  | .01                     |
| Dementia                                                        | 1,386 (2.89)  | 1,427 (3.04)  | .01                     |
| Delirium                                                        | 300 (.62)     | 204 (.43)     | .03                     |
| Mental disorders due to a general medical condition             | 399 (.83)     | 333 (.71)     | .01                     |
| Other                                                           | 4,127 (8.6)   | 4,144 (8.8)   | .01                     |
| Personality disorder diagnosis                                  | 5,167 (10.7)  | 3,558 (7.57)  | <b>.11</b>              |
| <b>Clinical Symptom Scales</b>                                  |               |               |                         |
| Admission:                                                      |               |               |                         |
| Mean±SD for Depression Rating Scale rated 0-14                  | 3.8±2.9       | 2.8±2.5       | <b>.36</b>              |
| Mean±SD for Anxiety Rating Scale rated 0-18                     | 3.0±3.3       | 2.4±3.0       | <b>.21</b>              |
| Mean±SD for Mania Symptom Scale, rated 0-18                     | 2.6±3.6       | 2.6±3.6       | .01                     |
| Mean±SD for Positive Symptom Scale, rated 0-12                  | 1.8±2.7       | 2.1±2.9       | <b>.10</b>              |
| Mean±SD for Negative Symptom Scale, rated 0-12                  | 3.9±4.0       | 3.5±3.9       | .09                     |
| Mean±SD for Risk of Harm to Others Scale rated 0-6              | 1.2±1.4       | 1.6±1.6       | <b>.22</b>              |
| Mean±SD for Severity of Self-Harm Scale rated 0-6               | 2.3±1.9       | 2.2±1.9       | .06                     |
| Mean±SD for Cognitive Performance Scale rated 0-6               | .6±1.2        | .6±1.2        | .01                     |
| Independent for managing finances                               | 36,326 (75.5) | 34,694 (73.9) | .04                     |
| Median (IQR) Global Assessment of Function                      | 40 (30-50)    | 40 (30-50)    | .02                     |
| Discharge:                                                      |               |               |                         |

|                                                    |               |               |            |
|----------------------------------------------------|---------------|---------------|------------|
| Mean±SD for Depression Rating Scale rated 0-14     | 1.6±2.2       | 1.2±1.8       | <b>.22</b> |
| Mean±SD for Anxiety Rating Scale rated 0-18        | 1.5±2.4       | 1.1±2.1       | <b>.15</b> |
| Mean±SD for Mania Symptom Scale, rated 0-18        | 1.2±2.4       | 1.2±2.5       | .02        |
| Mean±SD for Positive Symptom Scale, rated 0-12     | .7±1.7        | .8±1.8        | .08        |
| Mean±SD for Negative Symptom Scale, rated 0-12     | 1.4±2.7       | 1.4±2.6       | <.01       |
| Mean±SD for Risk of Harm to Others Scale rated 0-6 | .8±1.3        | 1.2±1.5       | <b>.29</b> |
| Mean±SD for Severity of Self-Harm Scale rated 0-6  | 1.7±1.9       | 1.6±1.8       | .04        |
| Mean±SD for Cognitive Performance Scale rated 0-6  | .4±1.0        | .4±1.0        | .01        |
| Independent for managing finances                  | 34,361 (71.5) | 32,496 (69.2) | .07        |
| Median (IQR) Global Assessment of Function         | 60 (50-65)    | 60 (50-65)    | .04        |

**\*More than one reason for involuntary admission can be recorded (i.e. categories not mutually exclusive).**



**Figure 1. Post-discharge outcomes by primary discharge diagnosis for psychotic disorders (n=22,152), bipolar disorder (n=11,769), major depressive disorder (n=26,987) and alcohol and substance use disorders (n=13,682)**

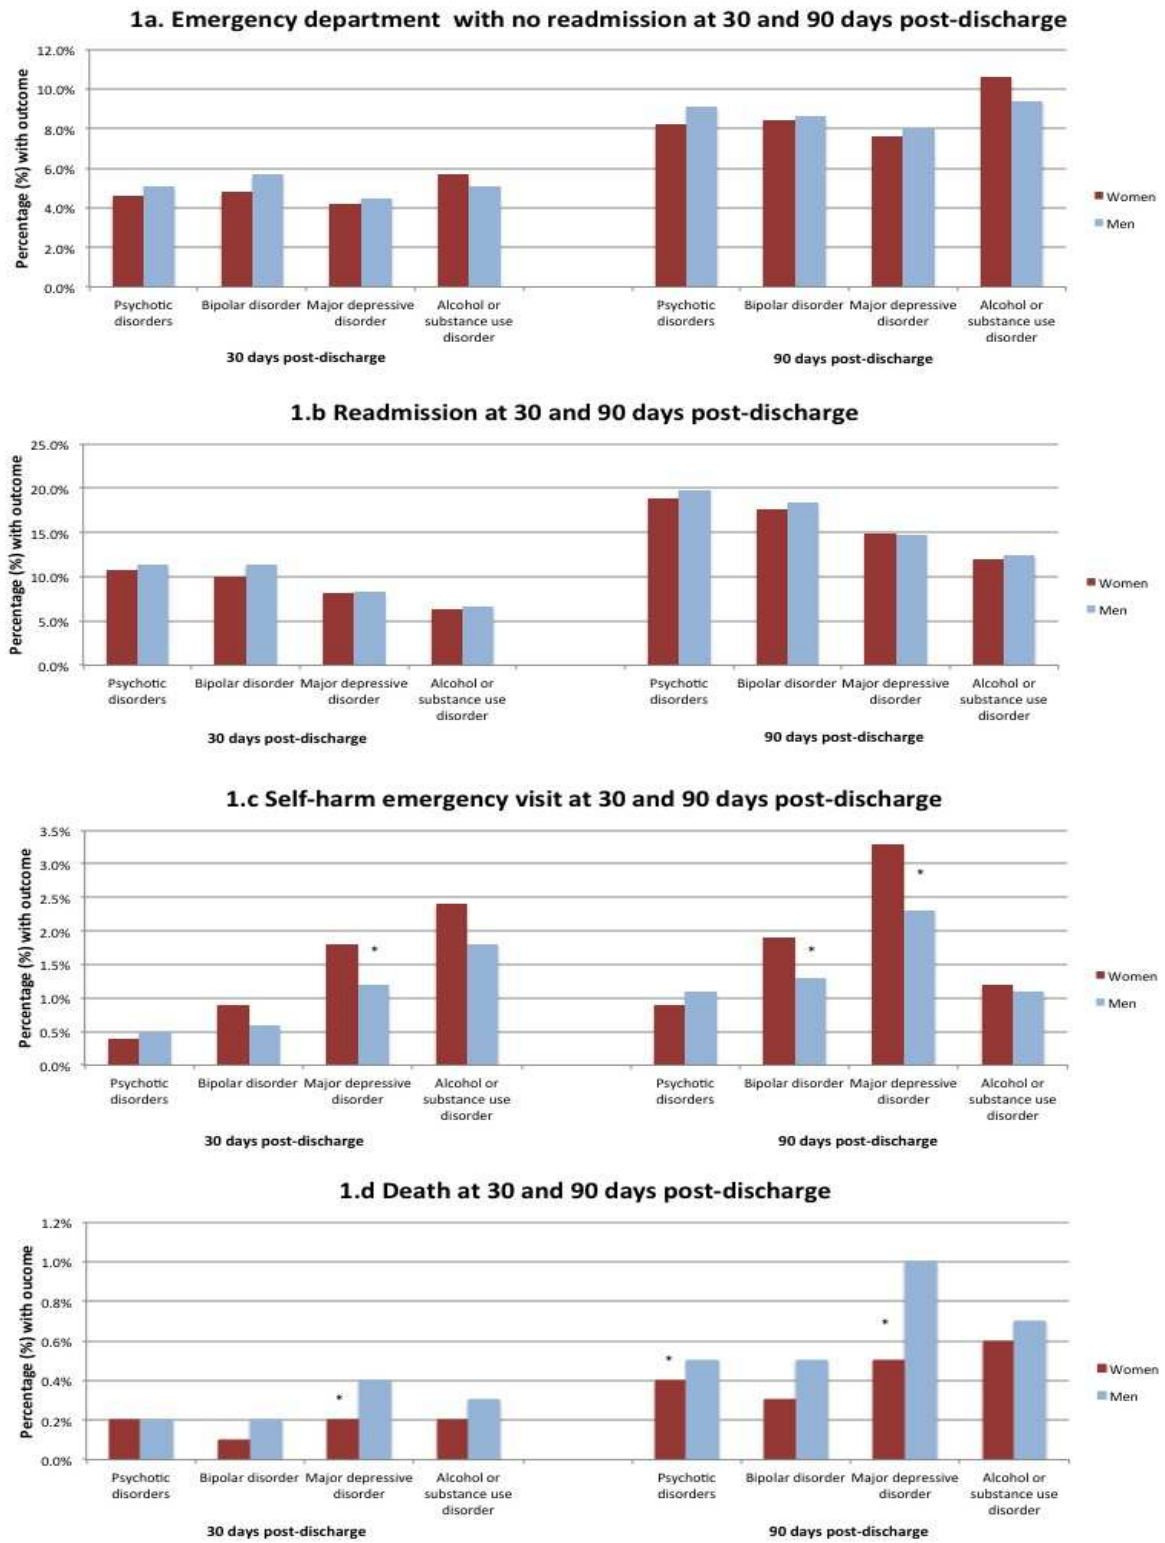

Supplement: appi.ps.201500547.ds001.pdf [file appi.ps.201500547.ds001.pdf]
